# Supplementary material for: Risk of developing tuberculosis after brief exposure in Norwegian children: results of a contact investigation
Source: PubMed Central journal article supplement — BMJ Open. 2012 Nov 7;2(6):e001816. doi: 10.1136/bmjopen-2012-001816 (PMC3533020; doi:10.1136/bmjopen-2012-001816), 2012-11-07
Supplement: bmjopen-2012-001816.draft_revisions.pdf [file bmjopen-2012-001816.draft_revisions.pdf]

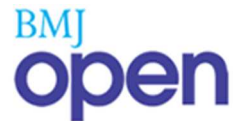

**Risk of developing tuberculosis after brief exposure in Norwegian children: results of a contact investigation**

|                                                                                                                                                         |                                                                                                                                                                                                                                                                                                                                                                                                                                                                                                                                                                                                                                                                                                                                                                                                                     |
|---------------------------------------------------------------------------------------------------------------------------------------------------------|---------------------------------------------------------------------------------------------------------------------------------------------------------------------------------------------------------------------------------------------------------------------------------------------------------------------------------------------------------------------------------------------------------------------------------------------------------------------------------------------------------------------------------------------------------------------------------------------------------------------------------------------------------------------------------------------------------------------------------------------------------------------------------------------------------------------|
| Journal:                                                                                                                                                | <i>BMJ Open</i>                                                                                                                                                                                                                                                                                                                                                                                                                                                                                                                                                                                                                                                                                                                                                                                                     |
| Manuscript ID:                                                                                                                                          | bmjopen-2012-001816                                                                                                                                                                                                                                                                                                                                                                                                                                                                                                                                                                                                                                                                                                                                                                                                 |
| Article Type:                                                                                                                                           | Research                                                                                                                                                                                                                                                                                                                                                                                                                                                                                                                                                                                                                                                                                                                                                                                                            |
| Date Submitted by the Author:                                                                                                                           | 25-Jul-2012                                                                                                                                                                                                                                                                                                                                                                                                                                                                                                                                                                                                                                                                                                                                                                                                         |
| Complete List of Authors:                                                                                                                               | Døllner, Henrik; Norwegian University of Science and Technology, Institute for Laboratory Medicine, Childrens and Womens Health; St. Olavs University Hospital, Department of Paediatrics<br>Ramm, Christina; Norwegian University of Science and Technology, Institute for Laboratory Medicine, Childrens and Womens Health<br>Harstad, Ingunn; Norwegian University of Science and Technology, Department of Public health and General Practice; St. Olavs University Hospital of Trondheim, Department of Thoracic Medicine<br>Afset, Jan; St. Olavs University Hospital, Department of Medical Microbiology; Norwegian University of Science and Technology, Institute for Laboratory Medicine, Childrens and Womens Health<br>Sagvik, Eli; Municipality of Trondheim, Vaccination and Infection Control Office |
| <b>Primary Subject Heading</b>:                                                                                                                         | Public health                                                                                                                                                                                                                                                                                                                                                                                                                                                                                                                                                                                                                                                                                                                                                                                                       |
| Secondary Subject Heading:                                                                                                                              | Infectious diseases, Paediatrics                                                                                                                                                                                                                                                                                                                                                                                                                                                                                                                                                                                                                                                                                                                                                                                    |
| Keywords:                                                                                                                                               | Tuberculosis < INFECTIOUS DISEASES, Community child health < PAEDIATRICS, Paediatric infectious disease & immunisation < PAEDIATRICS                                                                                                                                                                                                                                                                                                                                                                                                                                                                                                                                                                                                                                                                                |
| Note: The following files were submitted by the author for peer review, but cannot be converted to PDF. You must view these files (e.g. movies) online. |                                                                                                                                                                                                                                                                                                                                                                                                                                                                                                                                                                                                                                                                                                                                                                                                                     |
| dollner_2012.sav                                                                                                                                        |                                                                                                                                                                                                                                                                                                                                                                                                                                                                                                                                                                                                                                                                                                                                                                                                                     |

SCHOLARONE™  
Manuscripts

1  
2  
3  
4  
5 **Risk of developing tuberculosis after brief exposure in Norwegian children: results of a**  
6 **contact investigation**  
7

8  
9 Henrik Døllner<sup>1,2</sup>, Christina Terez Ramm<sup>1</sup>, Ingunn Harstad<sup>3,4</sup>, Jan Egil Afset<sup>1,5</sup>, Eli Sagvik<sup>6</sup>  
10  
11

12  
13 <sup>1</sup>Department of Laboratory Medicine, Childrens and Womens Health, <sup>4</sup>Department of Public  
14 health and General Practice, Norwegian University of Science and Technology, N-7491  
15 Trondheim, Norway, <sup>2</sup>Department of Pediatrics, <sup>3</sup>Department of Thoracic Medicine,  
16  
17 <sup>5</sup>Department of Medical Microbiology, St. Olavs University Hospital, N-7006 Trondheim,  
18 Norway, <sup>6</sup>Vaccination and Infection Control Office, Municipality of Trondheim, N-7004  
19 Trondheim, Norway.  
20  
21  
22  
23  
24  
25

26 **Corresponding author:** Henrik Døllner, PhD, MD  
27 Department of Paediatrics,  
28 St. Olavs University Hospital,  
29 Postbox 3250 Sluppen  
30 N-7006 Trondheim  
31 Norway.  
32 E-mail Henrik.dollner@ntnu.no  
33 Phone +47 72 57 46 58  
34  
35  
36  
37  
38  
39  
40

41 **Keywords** Tuberculosis, contact investigation, children  
42  
43  
44

45 **Word count** 2521  
46  
47  
48  
49  
50  
51  
52  
53  
54  
55  
56  
57  
58  
59  
60

## ABSTRACT

**Objective:** Prolonged exposure to adults with pulmonary tuberculosis is a risk factor for infecting children. We have studied to what extent a brief exposure may increase the risk of being infected in children.

**Design:** Observational study of a tuberculosis contact investigation.

**Setting:** 7 day-care centers and 4 after-school care centers in Norway.

**Participants:** 606 1-9 year old children who were exposed briefly to a male Norwegian with smear-positive pulmonary tuberculosis.

**Main outcome measures:** Number of children with latent and active tuberculosis detected by routine clinical examination, chest X-ray and use of a Mantoux tuberculin skin test (TST) and an interferon- $\gamma$  release assay (IGRA).

**Results:** The children were exposed a mean of 6.9 hours (range 3-18 hours). 2-3 months after the exposure, 11 children (1.8%) had a TST  $\geq 6$  mm, 6 (1.0%) had TST 4-5 mm, and 587 (97.2%) had a negative TST result. **Two children (0.3%)** with negative chest X-rays who were exposed 4.75 and 12 hours, respectively, had a positive IGRA test result, and were diagnosed with latent tuberculosis. None developed active tuberculosis.

**Conclusion:** Children from a high-income country attending day-care and after-school care centers had low risk of being infected after brief exposure less than 18 hours to an adult day-care helper with smear-positive pulmonary tuberculosis.

## INTRODUCTION

Children are vulnerable and easily develop tuberculosis compared to adults.<sup>1</sup> Proximity to contagious individuals and living in small and poorly ventilated rooms increases the risk of being infected.<sup>1</sup> Young children and those with impaired resistance may be at an even higher risk.<sup>1</sup> Although children may infect each other,<sup>2,3</sup> most often adults and in particular adult family members are the source of infection.<sup>4</sup> However, children may also be infected outside the family and several outbreaks in schools have documented that weeklong exposure in school classes to an infectious teacher or classmate increases the risk of infection substantially.<sup>5,6</sup> An outbreak in a Swedish day-care center documented that more than half of the attending children were infected after 5 months daily exposure to a preschool teacher with cavitary pulmonary tuberculosis.<sup>7</sup> None of 53 children who had visited the center less than 3 days were infected, suggesting that brief exposure less than 24 hours may not be dangerous.<sup>7</sup> On the other hand, extensive transmission to both adults and children of particular strains of *Mycobacterial tuberculosis* has been reported, even after a few hours exposure.<sup>8</sup>

**In February** 2010, a 20-year-old native-born Norwegian male was diagnosed with smear-positive pulmonary tuberculosis. During a three month long symptomatic period he worked as a helper in 7 day-care centers and 4 after-school care centers and briefly exposed 606 children, and 136 adult colleagues, family members and friends. Because there was only one likely infectious index case with several hundred contacts, and updated working hour lists at each institution permitted accurate quantification of the maximum exposure times of the children, we have used this event to study to what extent a brief exposure during day-care and after-school care may increase the risk of being infected with tuberculosis in children.

## METHODS

### The index case

The index case was a 20-year-old native-born Norwegian male who experienced chest pains, chronic cough and night sweating from November 2009 and until he was diagnosed at St. Olavs University Hospital, Trondheim, Norway in February 2010. A chest CT-scan revealed numerous infiltrates, bronchiectasis and cavities. **Two acid-fast bacilli per visual field were detected by direct microscopy of a spontaneously produced sputum specimen, and acid-fast bacilli were also detected by microscopy in three induced sputum and one bronchoalveolar lavage specimens.** Tuberculosis was confirmed by PCR and culture. The *Mycobacterium*

1  
2  
3 *tuberculosis* isolate was susceptible to all 1<sup>st</sup> line anti-tuberculous drugs. He recovered after  
4 six months standard anti-tuberculous treatment.  
5  
6

### 7 8 **The contacts**

9  
10 During the 3 months long symptomatic period the index case worked from 1-5 days at 7 day-  
11 care centers and 4 after-school care facilities (Table 1). In total he exposed 606 1-9 year old  
12 children and 88 adult colleagues (Table 1).  
13

14  
15 The living rooms in all the institutions were approximately 30 – 40 m<sup>2</sup> each, and the  
16 ventilation systems were considered to function well. The children spent most time in the  
17 living rooms with all doors shut and usually did not go between departments. In the day-care  
18 centers, 3 to 4 hours were spent outside in the playground each day. In the schools the index  
19 case worked in the after-school program, usually lasting from 01.00 – 05.00 PM. Less time  
20 was spent outside compared to the day-care centers. The index case had never cleaned  
21 children or changed diapers, but took part in cooking and helped feeding children. Most of the  
22 time he had played with children, but without much physical contact, and he never had  
23 children on his lap.  
24  
25  
26  
27  
28  
29

30  
31 From November 2009 to February 2010 the index case also exposed 19 adult colleagues in a  
32 telemarketing office, 17 family members, 11 friends and a girlfriend (Table 1).  
33  
34

### 35 36 **The contact investigation**

37  
38 All exposed children and colleagues in the day-care and after-school care centers, and all  
39 other adults exposed approximately 8 hours or more were investigated. A Mantoux  
40 Tuberculin skin test (TST) was conducted with intradermal injection of two Tuberkulin Units  
41 PPD RT 23 SSI (Statens Serum Institut, Copenhagen, Denmark) on the **ventral** aspect of the  
42 left forearm. The transverse diameter of the induration was measured 72 hours later. Based on  
43 specific indications an interferon- $\gamma$  release assay (IGRA) was performed at St. Olavs  
44 University Hospital, using the QuantiFERON-TB Gold assay (Cellestis, GmbH, Statens  
45 Serum Institut, Copenhagen, Denmark), as recommended by the manufacturer. Results were  
46 expressed in International Units (IU) of the interferon- $\gamma$  concentration with  $\geq 0.35$  IU/ml  
47 defined as positive.  
48  
49  
50  
51  
52  
53

54  
55 BCG vaccination status, nationality and general health status were recorded. The Norwegian  
56 Institute of Public Health recommended starting anti-tuberculous medication in all children  
57 younger than 2 years as soon as possible after exposure. In the present investigation all 12  
58  
59  
60

1  
2  
3 children who were younger than 2 years and many of the older children already had surpassed  
4 the “window period” lasting approximately 2 months after the last exposure day during which  
5 an immunologic response with TST and IGRA may not be expected.<sup>14</sup> Hence none were  
6 started on early medication, and the majority was examined for the first time approximately 2  
7 to 3 months after exposure. In the meantime, parents were advised of being alert of arising  
8 symptoms. All contacts were initially tested by a Mantoux TST. All children aged less than 2  
9 years and all children older than 2 years with TST  $\geq 6$  mm were tested by an IGRA test and  
10 chest X-ray. Children with a TST test result of 4-5 mm were tested by an IGRA test, and  
11 those with a positive IGRA test result had a chest X-ray. A repeat IGRA test was taken in a  
12 few children who had a positive result of the first IGRA test or based on clinical indication.  
13  
14  
15  
16  
17  
18  
19

20 All children aged less than 2 years and all older than 2 years with symptoms, a positive  
21 IGRA result, and/or X-ray findings were referred to St. Olavs University Hospital, for further  
22 examinations.  
23  
24

25 Latent tuberculosis was diagnosed in exposed individuals with no clinical and radiological  
26 findings who had a positive TST and IGRA test result.  
27  
28

29 Information regarding the extent of exposure of the children, as evidenced by the number of  
30 working hours of the index case at each day-care and after-school care center was collected  
31 from the stored working hour lists of the index case, and corrected after an interview with the  
32 index case.  
33  
34  
35  
36  
37

### 38 **Statistics**

39 Rates are expressed in percent and age, and exposure time as mean with standard deviation. A  
40 Spearman correlation test is used to evaluate the relation between total exposure time and  
41 TST induration.  
42  
43  
44  
45

## 46 **RESULTS**

47 In all, 572 out of 606 (94.4%) exposed children were born as native Norwegian, 2% (12/606)  
48 were foreign-born and 3.6% (22/606) were second-generation immigrants (Table 2). The  
49 mean age of the children was 6.1 years (Table 1). Thirty-seven children (37/606, 6.1%) were  
50 previously BCG vaccinated (Table 2).  
51  
52  
53  
54

### 55 **Test results and diagnoses**

56  
57  
58  
59  
60

1  
2  
3 Eleven children (11/606, 1.8%) had a positive TST result  $\geq 6$  mm, 6 (6/606, 1.0%) had TST  
4 results of 4-5 mm, and 587 (587/606, 97.2%) had a negative TST result (Table 2).

5  
6 **Approximately 30% of the children with a TST  $\geq 4$  were previously BCG vaccinated (Table**  
7 **2). In all 31 IGRA tests were taken in children with positive TST and children younger than 2**  
8 **years old. A second IGRA was taken in 6 children.** Three children had a positive initial IGRA  
9 test result, but one of these tested negative when the test was repeated (Table 2). One child  
10 had perihilar infiltrations on a chest X-ray, which later disappeared spontaneously. Another  
11 child had a diffuse infiltrate in the left lung, and was later diagnosed with an atypical  
12 mycobacterial infection (Table 2). On the basis of the history, clinical findings, results of TST  
13 and IGRA tests, and chest X-rays, no children were diagnosed with tuberculosis, and only two  
14 (2/606, 0.3%) had latent tuberculosis (Table 2).  
15  
16  
17  
18  
19  
20  
21

### 22 **Exposure times**

23  
24 The children had a total exposure time from 3 to 18 hours with a mean of 6.9 hours (SD 4.7  
25 hours, range 3-18 hours)(Figure 1). More than half was exposed between 2 and 6 hours  
26 (n=360, 59.4%), and about a third (n=223, 36.8%) were exposed more than 8 hours. **There**  
27 **was a weak correlation between total exposure time and TST test results ( $r=0.17$ ,  $p < 0.01$ )**  
28 **(Figure).**  
29  
30  
31  
32  
33

### 34 **Description of the individuals with latent tuberculosis**

35  
36 A 9 year old, healthy non-BCG vaccinated boy was exposed for 4.75 hours. He had a positive  
37 Mantoux of 8 mm, and negative chest X-ray and IGRA. Three months later a control IGRA  
38 turned out weakly positive (0.49 UI/ml), but the X-ray remained normal. Apart from exposure  
39 to the index case, no other risk factors were detected. The boy was diagnosed with latent  
40 tuberculosis and completed 3 months preventive treatment with isoniazid and rifampicin. An  
41 8 year old boy from Nigeria had been BCG vaccinated in his home country, and tested  
42 Mantoux negative upon arrival to Norway in 2009. Because he was mentally and physically  
43 disabled the index case worked as his personal assistant 4 hours every day for 3 days (in total  
44 12 hours). The boy was tested 4 weeks after the exposure and had a Mantoux test result of 3  
45 mm. Eight weeks after the last exposure an IGRA test was weakly positive (0.46 IU/ml). He  
46 had no clinical manifestations, and the chest X-ray was normal. He was diagnosed with latent  
47 tuberculosis. Recent infection could not be excluded, and he completed 3 months preventive  
48 isoniazid and rifampicin treatment.  
49  
50  
51  
52  
53  
54  
55  
56  
57  
58  
59  
60



1  
2  
3 Eight adults (8/136, 5.9%) were diagnosed with latent tuberculosis, but only 2 (2/136, 1.5%),  
4 a cousin and an uncle who had been in close and longstanding contact with the index case,  
5 were considered to be infected recently (data not shown).  
6  
7  
8  
9

## 10 DISCUSSION

11 We found that only 2 children in the after-school care centers developed latent tuberculosis  
12 after being exposed less than 18 hours to a highly infectious helper with smear-positive lung  
13 tuberculosis. No children in the day-care centers were infected. These observations support  
14 clinical experience that a brief exposure even to a highly infectious individual may not result  
15 in high risk for tuberculosis infection for healthy children. However, other factors than a brief  
16 exposure time may have contributed to a low transmission rate in the present context of day-  
17 care and after-school care facilities, such as the fact that the exposure took place in large  
18 rooms, that the air quality was good, and in particular that a substantial part of the exposure  
19 took place outdoors. A low transmission rate among the non-native children may also be  
20 explained by the fact that most were BCG vaccinated. Instead of being the result of  
21 environmental factors or patient characteristics, it has been described that particularly  
22 efficient human-to-human transmission may be seen with some *Mycobacterial tuberculosis*  
23 strains.<sup>8</sup> One healthy 9 years old boy without risk factors was infected despite a very brief  
24 exposure for 4-5 hours and it might raise a suspicion that this could be such a highly virulent  
25 strain. However, the fact that no more cases evolved during the next two years does not  
26 support this hypothesis.  
27  
28  
29  
30  
31  
32  
33  
34  
35  
36  
37  
38

39 Several reports have documented how long-term exposure to adults as well as children with  
40 tuberculosis increases the risk of transmission to other children in day-care centers,<sup>7,9</sup> in  
41 schools<sup>6,10,11</sup> and in health care institutions in high-income countries.<sup>8</sup> Although the evidence  
42 of the risk of brief exposure in such institutions is more limited, currently the Norwegian  
43 Institute of Public Health and others recommends investigating children who have been  
44 exposed to smear-positive individuals more than 8 hours.<sup>13,14</sup> A Swedish study reported that  
45 no tuberculosis transmission took place among 53 visiting children who were exposed to a  
46 highly infectious helper less than three days in a day-care center, corresponding to a total  
47 exposure time of less than 24 hours.<sup>7</sup> Thus, our study and the Swedish study quite similarly  
48 found that less than 18 to 24 hours exposure may not pose a significant risk for healthy  
49 children attending day-care or after school-care centers in Norway and Sweden. However,  
50 tuberculosis transmission is complex and several factors other than exposure time influence  
51  
52  
53  
54  
55  
56  
57  
58  
59  
60



1  
2  
3 the risk of being infected, in particular infectivity of the index case, various characteristics of  
4 the exposed children such as low age and vulnerability, and how close the exposure has been  
5 in terms of physical contact, room size and air quality.<sup>14</sup> More evidence on the impact of  
6 exposure time therefore should be collected before current guidelines may be changed in line  
7 with our observation.  
8  
9  
10

11  
12 The index case had worked at several different locations during the three months he had  
13 symptoms. Due to the brief exposure at several places it was difficult to define an inner circle  
14 of more heavily exposed children to investigate first, and therefore it was decided to  
15 investigate all. We collected information about how long time the index case had worked at  
16 the various institutions from stored working lists, and adjusted it through an interview with  
17 him. Thus we believe that our estimates of exposure times are reliable. The index case did not  
18 work to the same extent with every child, and therefore the exposures of individual children  
19 probably have varied. Nevertheless, he seemed to remember quite well the amount of time he  
20 had spent with several individual children, and we think that he provided reliable estimates of  
21 the exposure to the two children who were infected. The National Institute of Public Health in  
22 Norway at the moment for this contact investigation recommended starting anti-tuberculous  
23 medication in all exposed children less than 2 years as soon as possible.<sup>13</sup> However, all 12  
24 children who were younger than 2 years old and many of the older children already had  
25 surpassed the “window period”. Hence no one was started on early medication, and most were  
26 examined for the first time approximately 2 to 3 months after exposure. We used from  
27 practical and economic reasons a TST as the primary screening tool, and an IGRA test as a  
28 confirmatory test, since the IGRA test may be more specific than TST, even in children less  
29 than five years old.<sup>15, 16</sup> We also used IGRA to examine some children with a legible TST  
30 result <6 mm in order to increase the chance of detecting infection, but because the diagnostic  
31 accuracy of both TST and IGRA tests is not optimal in children less than 5 years of age,<sup>15,16</sup>  
32 we cannot be sure that all latent cases have been detected. On the other hand, one may discuss  
33 whether the two children with latent tuberculosis were correctly diagnosed because they only  
34 had mildly elevated TST and IGRA test results. However, since latent infection could not be  
35 excluded, they were given prophylactic treatment. We found that TST induration correlated  
36 weakly with total exposure time. Many of the children with positive TST results were BCG-  
37 vaccinated non-native children without any clinical findings, and it may be a strength of the  
38 study that they were not classified as infected.  
39  
40  
41  
42  
43  
44  
45  
46  
47  
48  
49  
50  
51  
52  
53  
54  
55  
56  
57  
58  
59  
60

1  
2  
3 We conclude that Norwegian children attending several day-care and after-school care  
4 centers had a low risk of being infected after brief exposure less than 18 hours to a highly  
5 infectious adult helper with smear-positive pulmonary tuberculosis. These findings may  
6 suggest that contact investigation in day-care and after-school care centers may be avoided in  
7 children who are exposed less than 18 hours. However, several factors other than exposure  
8 time influence tuberculosis transmission, and more evidence should be collected before  
9 current public health guidelines may be changed in line with our observation.  
10  
11  
12  
13  
14  
15  
16  
17  
18  
19  
20  
21  
22  
23  
24  
25  
26  
27  
28  
29  
30  
31  
32  
33  
34  
35  
36  
37  
38  
39  
40  
41  
42  
43  
44  
45  
46  
47  
48  
49  
50  
51  
52  
53  
54  
55  
56  
57  
58  
59  
60

**Table 1** Number of children and adults at various day-care and after school-care centers who were exposed to an adult with smear-positive pulmonary tuberculosis

|                                    | Children |                                 | Adults |
|------------------------------------|----------|---------------------------------|--------|
|                                    | Number   | Mean age (years)<br>(SD, range) | Number |
| Day care centers (total)           | 191      | 3.9 (1.0, 1-6)                  | 44     |
| Center 1                           | 37       | 4.1 (0.7, 3-5)                  | 7      |
| Center 2                           | 12       | 1.5 (0.5, 1.2)                  | 4      |
| Center 3                           | 16       | 4.0 (0.7, 3-5)                  | 3      |
| Center 4 (3 departments)           | 43       | 4.1 (0.8, 3-5)                  | 17     |
| Center 5 (2 departments)           | 34       | 3.9 (1.0, 3-6)                  | 7      |
| Center 6                           | 27       | 4.0 (0.8, 3-5)                  | 3      |
| Center 7                           | 22       | 4.4 (1.1, 3-6)                  | 3      |
| After school care centers (total)  | 415      | 7.2 (0.9, 5-9)                  | 44     |
| Center 1 (4 classes)               | 193      | 7.2 (1.0, 5-9)                  | 13     |
| Center 2 (1 class)                 | 33       | 8.1 (0.2, 8-9)                  | 8      |
| Center 3 (4 classes)               | 118      | 6.9 (0.8, 6-9)                  | 10     |
| Center 4 (3 classes)               | 71       | 7.6 (0.7, 7-9)                  | 13     |
| Colleagues (telemarketing company) |          |                                 | 19     |
| Family                             |          |                                 | 17     |
| Friends and girlfriend             |          |                                 | 12     |
| Total investigated contacts        | 606      | 6.1 (1.8, 1-9)                  | 136    |

**Table 2** BCG status, test results of tuberculin skin test (TST) and interferon- $\gamma$  release assay (IGRA), result of chest X ray, number of children referred to hospital and number with latent tuberculosis in relation to nationality and specified into age groups less than or more than 5 years for children who were exposed to an adult with smear-positive pulmonary tuberculosis

|                                                         | Native Norwegian  |                         |                 | Non-native born in Norway |                        |                 | Non-native born abroad |                       |                 | All children<br>N=606 |
|---------------------------------------------------------|-------------------|-------------------------|-----------------|---------------------------|------------------------|-----------------|------------------------|-----------------------|-----------------|-----------------------|
|                                                         | <5 years<br>N=119 | $\geq$ 5 years<br>N=453 | Total<br>N=572  | <5 years<br>N=10          | $\geq$ 5 years<br>N=12 | Total<br>N=22   | <5 years<br>N=4        | $\geq$ 5 years<br>N=8 | Total<br>N=12   |                       |
| BCG vaccinated                                          | 2 (1.7)*          | 8 (1.8)                 | 10 (1.7)        | 10 (100)                  | 9 (75.0)               | 19 (86.4)       | 1 (25.0)               | 7 (87.5)              | 8 (66.7)        | 37 (6.1)              |
| TST 4-5 mm                                              | 2 (1.7)           | 0                       | 2 (0.3)         | 0                         | 1 (8.3)                | 1 (4.5)         | 1 (25.0)               | 2 (25.0)              | 3 (25.0)        | 6 (1.0)               |
| TST $\geq$ 6 mm                                         | 2 (1.7)           | 5 (1.1)                 | 7 (1.2)         | 1 (10.0)                  | 2 (16.7)               | 3 (13.6)        | 0                      | 1 (12.5)              | 1 (8.3)         | 11 (1.8)              |
| <b>BCG vaccinated and<br/>TST <math>\geq</math>4 mm</b> | <b>0 (0)**</b>    | <b>3 (37.5)</b>         | <b>3 (30.0)</b> | <b>1 (10.0)</b>           | <b>3 (33.3)</b>        | <b>4 (21.1)</b> | <b>1 (100)</b>         | <b>3 (42.9)</b>       | <b>4 (50.0)</b> | <b>11 (29.7)</b>      |
| IGRA positive                                           | 0                 | 1 (0.2)                 | 1 (0.2)         | 0                         | 0                      | 0               | 0                      | 2 (25.0)              | 2 (16.7)        | 3 (0.5)               |
| X-ray positive                                          | 2 (1.7)           | 0                       | 2 (0.3)         | 0                         | 0                      | 0               | 0                      | 0                     | 0               | 2 (0.3)               |
| Referred to hospital                                    | 12 (10.0)         | 1 (0.2)                 | 13 (2.3)        | 1 (10.0)                  | 0                      | 1 (4.5)         | 0                      | 2 (25.0)              | 2 (16.7)        | 16 (2.6)              |
| Latent tuberculosis                                     | 0                 | 1 (0.2)                 | 1 (0.2)         | 0                         | 0                      | 0               | 0                      | 1 (12.5)              | 1 (8.3)         | 2 (0.3)               |

\*number (percent of children in the column);\*\*number (percent of BCG vaccinated children)

1  
2  
3 **Acknowledgement** Susceptibility testing of the M. tuberculosis isolate was done at the  
4 National reference laboratory for mycobacteria at the Norwegian Institute of Public Health.  
5 We are grateful to Dr. Per Eirik Hæreid who participated in the preparation of the manuscript.  
6  
7  
8

9  
10 **Contributors** Henrik Døllner initiated the study and is the main responsible for the study  
11 (guarantor), participated in the analysis of the data and in the writing of the manuscript and  
12 revised it critically, and approved the final version; Christina Terez Ramm participated in the  
13 planning of the study, collected all data, participated in the analysis of the data, wrote the first  
14 draft of the manuscript, revised it critically and approved the final version; Ingunn Harstad  
15 participated in the interpretation of the data, participated in the writing of the manuscript,  
16 revised it critically and approved the final version; Jan Egil Afset participated in the  
17 interpretation of the data, participated in the writing of the manuscript, revised it critically and  
18 approved the final version; Eli Sagvik was responsible for the contact investigation,  
19 participated in the planning of the study, participated in the interpretation of the data,  
20 participated in the writing of the manuscript and revised it critically and approved the final  
21 version.  
22  
23  
24  
25  
26  
27  
28  
29

30  
31 **Funding** None.  
32

33  
34 **Competing interests** None.  
35  
36

37  
38 **Ethics approval** The Regional Committee for Medical and Health Research Ethics in Mid-  
39 Norway approved the study, including an exemption to collect informed consents from the  
40 participating individuals. The index case accepted to participate in interviews and to publish  
41 the information.  
42  
43  
44

45  
46 **Data sharing statement** There are no additional data available.  
47  
48  
49  
50  
51  
52  
53  
54  
55  
56  
57  
58  
59  
60

## REFERENCES

1. Newton SM, Brent AJ, Anderson S, et al. Paediatric tuberculosis. *Lancet Infect Dis* 2008;**8**:498-510.
2. Paranjothy S, Eisenhut M, Lilley M, et al. Extensive transmission of Mycobacterium tuberculosis from 9 year old child with pulmonary tuberculosis and negative sputum smear. *BMJ* 2008;**337**:573-5.
3. Cardona M, Bek MD, Mills K, et al. Transmission of tuberculosis from a seven-year-old child in a Sydney school. *J Paediatr Child Health* 1999;**35**:375-8.
4. Singh M, Mynak ML, Kumar L, et al. Prevalence and risk factors for transmission of infection among children in household contact with adults having pulmonary tuberculosis. *Arch Dis Child* 2005;**90**:624-8.
5. Ewer K, Deeks J, Alvarez L, et al. Comparison of T-cell-based assay with tuberculin skin test for diagnosis of Mycobacterium tuberculosis infection in a school tuberculosis outbreak. *Lancet* 2003;**361**:1168-73.
6. Caley M, Fowler T, Welch S, et al. Risk of developing tuberculosis from a school contact: retrospective cohort study, United Kingdom, 2009. *Euro Surveill* 2010;**15**(11). [www.eurosurveillance.org/ViewArticle.aspx?ArticleId=19510](http://www.eurosurveillance.org/ViewArticle.aspx?ArticleId=19510) (accessed 7 Jun 2012).
7. Gillman A, Berggren I, Bergstrom SE, et al. Primary tuberculosis infection in 35 children at a Swedish day care center. *Pediatr Infect Dis J* 2008;**27**:1078-82.
8. Valway SE, Sanchez MP, Shinnick TF, et al. An outbreak involving extensive transmission of a virulent strain of Mycobacterium tuberculosis. *N Engl J Med* 1998;**338**:633-9.
9. Aivazis V, Pardalos G, Kirkou-Thanou P, et al. Tuberculosis outbreak in a day care centre: always a risk. *Acta Paediatr* 2004;**93**:140.
10. Higuchi K, Kondo S, Wada M, et al. Contact investigation in a primary school using a whole blood interferon-gamma assay. *J Infect* 2009;**58**:352-7.
11. Roberts JR, Mason BW, Paranjothy S, et al. The transmission of tuberculosis in schools involving children 3 to 11 years of age. *Pediatr Infect Dis J* 2012;**31**:82-4.
12. Reynolds DL, Gillis F, Kitai I, et al. Transmission of Mycobacterium tuberculosis from an infant. *Int J Tuberc Lung Dis* 2006;**10**:1051-6.
13. Tuberkuloseveilederen som e-bok. The Norwegian Institute of Public Health. [www.fhi.no/eway/default.aspx?pid=233&trg=MainArea\\_5561&MainArea\\_5661=6034:0:15,5092:1:0:0:::0:0](http://www.fhi.no/eway/default.aspx?pid=233&trg=MainArea_5561&MainArea_5661=6034:0:15,5092:1:0:0:::0:0) (accessed 7 Jun 2012).
14. Erkens CG, Kamphorst M, Abubakar I, et al. Tuberculosis contact investigation in low prevalence countries: a European consensus. *Eur Respir J* 2010;**36**:925-49.
15. Mandalakas AM, Detjen AK, Hesseling AC, et al. Interferon-gamma release assays and childhood tuberculosis: systematic review and meta-analysis. *Int J Tuberc Lung Dis* 2011;**15**:1018-32.
16. Machingaidze S, Wiysonge CS, Gonzalez-Angulo Y, et al. The utility of an interferon gamma release assay for diagnosis of latent tuberculosis infection and disease in children: a systematic review and meta-analysis. *Pediatr Infect Dis J* 2011;**30**:694-700.

### Article focus

- It is well-known that prolonged exposure to adults with smear-positive pulmonary tuberculosis increases the risk of being infected in children.
- Limited evidence exists on the risk of brief exposure among children in day-care or after-school care facilities in high-income countries.

### Key Messages

- Only 2 out of 606 (0.3%) children attending several Norwegian day-care and after-school care centers were diagnosed with latent tuberculosis after being exposed less than 18 hours to a highly infectious smear-positive adult helper with pulmonary tuberculosis.
- Tuberculosis transmission is complex and influenced by other factors than exposure time.
- More evidence should be collected before current public health recommendations for the investigation of exposed children in day-care and after school care may be changed.

### Strengths and limitations

- This large contact investigation may be the nearest to come an intervention study.
- Reliable information about exposure times was available.
- Although it is a strength that latent tuberculosis was diagnosed using a tuberculin skin test in every child and an interferon gamma release assay as a confirmatory test, it is a limitation that the sensitivity of both tests may be limited in children.

### Figure legends

**Figure 1** Number of children who were exposed to an adult helper with smear-positive tuberculosis in relation to tuberculin skin tests induration (mm) and total exposure time (hours).



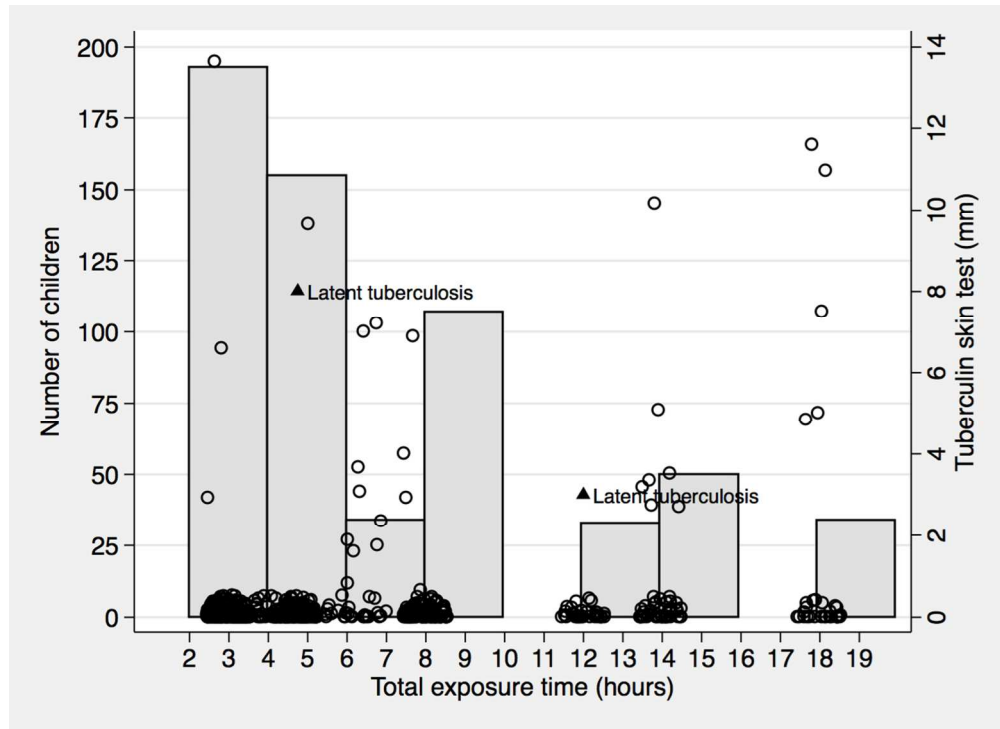

Figure. Number of children who were exposed to an adult helper with smear-positive tuberculosis in relation to tuberculin skin tests induration (mm) and total exposure time (hours).  
465x338mm (72 x 72 DPI)

Review only



**Risk of developing tuberculosis after brief exposure in Norwegian children: results of a contact investigation**

|                                                                                                                                                         |                                                                                                                                                                                                                                                                                                                                                                                                                                                                                                                                                                                                                                                                                                                                                                                                                     |
|---------------------------------------------------------------------------------------------------------------------------------------------------------|---------------------------------------------------------------------------------------------------------------------------------------------------------------------------------------------------------------------------------------------------------------------------------------------------------------------------------------------------------------------------------------------------------------------------------------------------------------------------------------------------------------------------------------------------------------------------------------------------------------------------------------------------------------------------------------------------------------------------------------------------------------------------------------------------------------------|
| Journal:                                                                                                                                                | <i>BMJ Open</i>                                                                                                                                                                                                                                                                                                                                                                                                                                                                                                                                                                                                                                                                                                                                                                                                     |
| Manuscript ID:                                                                                                                                          | bmjopen-2012-001816.R1                                                                                                                                                                                                                                                                                                                                                                                                                                                                                                                                                                                                                                                                                                                                                                                              |
| Article Type:                                                                                                                                           | Research                                                                                                                                                                                                                                                                                                                                                                                                                                                                                                                                                                                                                                                                                                                                                                                                            |
| Date Submitted by the Author:                                                                                                                           | 29-Sep-2012                                                                                                                                                                                                                                                                                                                                                                                                                                                                                                                                                                                                                                                                                                                                                                                                         |
| Complete List of Authors:                                                                                                                               | Døllner, Henrik; Norwegian University of Science and Technology, Institute for Laboratory Medicine, Childrens and Womens Health; St. Olavs University Hospital, Department of Paediatrics<br>Ramm, Christina; Norwegian University of Science and Technology, Institute for Laboratory Medicine, Childrens and Womens Health<br>Harstad, Ingunn; Norwegian University of Science and Technology, Department of Public health and General Practice; St. Olavs University Hospital of Trondheim, Department of Thoracic Medicine<br>Afset, Jan; St. Olavs University Hospital, Department of Medical Microbiology; Norwegian University of Science and Technology, Institute for Laboratory Medicine, Childrens and Womens Health<br>Sagvik, Eli; Municipality of Trondheim, Vaccination and Infection Control Office |
| <b>Primary Subject Heading</b>:                                                                                                                         | Public health                                                                                                                                                                                                                                                                                                                                                                                                                                                                                                                                                                                                                                                                                                                                                                                                       |
| Secondary Subject Heading:                                                                                                                              | Infectious diseases, Paediatrics, Respiratory medicine                                                                                                                                                                                                                                                                                                                                                                                                                                                                                                                                                                                                                                                                                                                                                              |
| Keywords:                                                                                                                                               | Tuberculosis < INFECTIOUS DISEASES, Community child health < PAEDIATRICS, Paediatric infectious disease & immunisation < PAEDIATRICS                                                                                                                                                                                                                                                                                                                                                                                                                                                                                                                                                                                                                                                                                |
| Note: The following files were submitted by the author for peer review, but cannot be converted to PDF. You must view these files (e.g. movies) online. |                                                                                                                                                                                                                                                                                                                                                                                                                                                                                                                                                                                                                                                                                                                                                                                                                     |
| dollner_2012.sav                                                                                                                                        |                                                                                                                                                                                                                                                                                                                                                                                                                                                                                                                                                                                                                                                                                                                                                                                                                     |

1  
2  
3  
4  
5 **Risk of developing tuberculosis after brief exposure in Norwegian children: results of a**  
6 **contact investigation**  
7

8  
9 Henrik Døllner<sup>1,2</sup>, Christina Terez Ramm<sup>1</sup>, Ingunn Harstad<sup>3,4</sup>, Jan Egil Afset<sup>1,5</sup>, Eli Sagvik<sup>6</sup>  
10  
11

12  
13 <sup>1</sup>Department of Laboratory Medicine, Childrens and Womens Health, <sup>4</sup>Department of Public  
14 health and General Practice, Norwegian University of Science and Technology, N-7491  
15 Trondheim, Norway, <sup>2</sup>Department of Pediatrics, <sup>3</sup>Department of Thoracic Medicine,  
16  
17 <sup>5</sup>Department of Medical Microbiology, St. Olavs University Hospital, N-7006 Trondheim,  
18 Norway, <sup>6</sup>Vaccination and Infection Control Office, Municipality of Trondheim, N-7004  
19 Trondheim, Norway.  
20  
21  
22  
23  
24  
25

26 **Corresponding author:** Henrik Døllner, PhD, MD  
27 Department of Paediatrics,  
28 St. Olavs University Hospital,  
29 Postbox 3250 Sluppen  
30 N-7006 Trondheim  
31 Norway.  
32 E-mail Henrik.dollner@ntnu.no  
33 Phone +47 72 57 46 58  
34  
35  
36  
37  
38  
39  
40

41  
42 **Keywords** Tuberculosis, contact investigation, children  
43  
44

45  
46 **Word count** 2512  
47  
48  
49  
50  
51  
52  
53  
54  
55  
56  
57  
58  
59  
60

## ABSTRACT

**Objective:** Prolonged exposure to adults with pulmonary tuberculosis is a risk factor for infecting children. We have studied to what extent a brief exposure may increase the risk of being infected in children.

**Design:** Observational study of a tuberculosis contact investigation.

**Setting:** 7 day-care centers and 4 after-school care centers in Norway.

**Participants:** 606 1-9 year old children who were exposed briefly to a male Norwegian with smear-positive pulmonary tuberculosis.

**Main outcome measures:** Number of children with latent and active tuberculosis detected by routine clinical examination, chest X-ray and use of a Mantoux tuberculin skin test (TST) and an interferon- $\gamma$  release assay (IGRA).

**Results:** The children were exposed a mean of 6.9 hours (range 3-18 hours). 2-3 months after the exposure, 11 children (1.8%) had a TST  $\geq 6$  mm, 6 (1.0%) had TST 4-5 mm, and 587 (97.2%) had a negative TST result. Two children (0.3%) with negative chest X-rays who were exposed 4.75 and 12 hours, respectively, had a positive IGRA test result, and were diagnosed with latent tuberculosis. None developed active tuberculosis.

**Conclusion:** Children from a high-income country attending day-care and after-school care centers had low risk of being infected after brief exposure less than 18 hours to an adult day-care helper with smear-positive pulmonary tuberculosis.

## INTRODUCTION

Children are vulnerable and easily develop tuberculosis compared to adults.<sup>1</sup> Proximity to contagious individuals and living in small and poorly ventilated rooms increases the risk of being infected.<sup>1</sup> Young children and those with impaired resistance may be at an even higher risk.<sup>1</sup> Although children may infect each other,<sup>2,3</sup> most often adults and in particular adult family members are the source of infection.<sup>4</sup> However, children may also be infected outside the family and several outbreaks in schools have documented that weeklong exposure in school classes to an infectious teacher or classmate increases the risk of infection substantially.<sup>5,6</sup> An outbreak in a Swedish day-care center documented that more than half of the attending children were infected after 5 months daily exposure to a preschool teacher with cavitary pulmonary tuberculosis.<sup>7</sup> None of 53 children who had visited the center less than 3 days were infected, suggesting that brief exposure less than 24 hours may not be dangerous.<sup>7</sup> On the other hand, extensive transmission to both adults and children of particular strains of *Mycobacterial tuberculosis* has been reported, even after a few hours exposure.<sup>8</sup>

In February 2010, a 20-year-old native-born Norwegian male was diagnosed with smear-positive pulmonary tuberculosis. During a three month long symptomatic period he worked as a helper in 7 day-care centers and 4 after-school care centers and briefly exposed 606 children, and 136 adult colleagues, family members and friends. Because there was only one likely infectious index case with several hundred contacts, and updated working hour lists at each institution permitted accurate quantification of the maximum exposure times of the children, we have used this event to study to what extent a brief exposure during day-care and after-school care may increase the risk of being infected with tuberculosis in children.

## METHODS

### The index case

The index case was a 20-year-old native-born Norwegian male who experienced chest pains, chronic cough and night sweating from November 2009 and until he was diagnosed at St. Olavs University Hospital, Trondheim, Norway in February 2010. A chest CT-scan revealed numerous infiltrates, bronchiectasis and cavities. Two acid-fast bacilli per visual field were detected by direct microscopy of a spontaneously produced sputum specimen, and acid-fast bacilli were also detected by microscopy in three induced sputum and one bronchoalveolar lavage specimens. Tuberculosis was confirmed by PCR and culture. The *Mycobacterium*

1  
2  
3 *tuberculosis* isolate was susceptible to all 1<sup>st</sup> line anti-tuberculous drugs. He recovered after  
4 six months standard anti-tuberculous treatment.  
5  
6

### 7 8 **The contacts**

9  
10 During the 3 months long symptomatic period the index case worked from 1-5 days at 7 day-  
11 care centers and 4 after-school care facilities (Table 1). In total he exposed 606 1-9 year old  
12 children and 88 adult colleagues (Table 1).  
13

14  
15 The living rooms in all the institutions were approximately 30 – 40 m<sup>2</sup> each, and the  
16 ventilation systems were considered to function well. The children spent most time in the  
17 living rooms with all doors shut and usually did not go between departments. In the day-care  
18 centers, 3 to 4 hours were spent outside in the playground each day. In the schools the index  
19 case worked in the after-school program, usually lasting from 01.00 – 05.00 PM. Less time  
20 was spent outside compared to the day-care centers. The index case had never cleaned  
21 children or changed diapers, but took part in cooking and helped feeding children. Most of the  
22 time he had played with children, but without much physical contact, and he never had  
23 children on his lap.  
24  
25  
26  
27  
28  
29

30  
31 From November 2009 to February 2010 the index case also exposed 19 adult colleagues in a  
32 telemarketing office, 17 family members, 11 friends and a girlfriend (Table 1).  
33  
34

### 35 36 **The contact investigation**

37  
38 All exposed children and colleagues in the day-care and after-school care centers, and all  
39 other adults exposed approximately 8 hours or more were investigated. A Mantoux  
40 Tuberculin skin test (TST) was conducted with intradermal injection of two Tuberkulin Units  
41 PPD RT 23 SSI (Statens Serum Institut, Copenhagen, Denmark) on the ventral aspect of the  
42 left forearm. The transverse diameter of the induration was measured 72 hours later. Based on  
43 specific indications an interferon- $\gamma$  release assay (IGRA) was performed at St. Olavs  
44 University Hospital, using the QuantiFERON-TB Gold assay (Cellestis, GmbH, Statens  
45 Serum Institut, Copenhagen, Denmark), as recommended by the manufacturer. Results were  
46 expressed in International Units (IU) of the interferon- $\gamma$  concentration with  $\geq 0.35$  IU/ml  
47 defined as positive.  
48  
49  
50  
51  
52  
53

54  
55 BCG vaccination status, nationality and general health status were recorded. The Norwegian  
56 Institute of Public Health recommended starting anti-tuberculous medication in all children  
57 younger than 2 years as soon as possible after exposure. In the present investigation all 12  
58  
59  
60

1  
2  
3 children who were younger than 2 years and many of the older children already had surpassed  
4 the “window period” lasting approximately 2 months after the last exposure day during which  
5 an immunologic response with TST and IGRA may not be expected.<sup>14</sup> Hence none were  
6 started on early medication, and the majority was examined for the first time approximately 2  
7 to 3 months after exposure. In the meantime, parents were advised of being alert of arising  
8 symptoms. All contacts were initially tested by a Mantoux TST. All children aged less than 2  
9 years and all children older than 2 years with TST  $\geq 6$  mm were tested by an IGRA test and  
10 chest X-ray. Children with a TST test result of 4-5 mm were tested by an IGRA test, and  
11 those with a positive IGRA test result had a chest X-ray. A repeat IGRA test was taken in a  
12 few children who had a positive result of the first IGRA test or based on clinical indication.  
13  
14  
15  
16  
17  
18  
19

20 All children aged less than 2 years and all older than 2 years with symptoms, a positive  
21 IGRA result, and/or X-ray findings were referred to St. Olavs University Hospital, for further  
22 examinations.  
23  
24

25 Latent tuberculosis was diagnosed in exposed individuals with no clinical and radiological  
26 findings who had a positive TST and IGRA test result.  
27  
28

29 Information regarding the extent of exposure of the children, as evidenced by the number of  
30 working hours of the index case at each day-care and after-school care center was collected  
31 from the stored working hour lists of the index case, and corrected after an interview with the  
32 index case.  
33  
34  
35  
36  
37

### 38 **Statistics**

39 Rates are expressed in percent and age, and exposure time as mean with standard deviation. A  
40 Spearman correlation test is used to evaluate the relation between total exposure time and  
41 TST induration.  
42  
43  
44  
45

## 46 **RESULTS**

47 In all, 572 out of 606 (94.4%) exposed children were born as native Norwegian, 2% (12/606)  
48 were foreign-born and 3.6% (22/606) were second-generation immigrants (Table 2). The  
49 mean age of the children was 6.1 years (Table 1). Thirty-seven children (37/606, 6.1%) were  
50 previously BCG vaccinated (Table 2).  
51  
52  
53  
54  
55

### 56 **Test results and diagnoses**

57  
58  
59  
60



1  
2  
3 Eleven children (11/606, 1.8%) had a positive TST result  $\geq 6$  mm, 6 (6/606, 1.0%) had TST  
4 results of 4-5 mm, and 587 (587/606, 97.2%) had a negative TST result (Table 2).

5  
6 Approximately 30% of the children with a TST  $\geq 4$  were previously BCG vaccinated (Table  
7 2). In all 31 IGRA tests were taken in children with positive TST and children younger than 2  
8 years old. A second IGRA was taken in 6 children. Three children had a positive initial IGRA  
9 test result, but one of these tested negative when the test was repeated (Table 2). One child  
10 had perihilar infiltrations on a chest X-ray, which later disappeared spontaneously. Another  
11 child had a diffuse infiltrate in the left lung, and was later diagnosed with an atypical  
12 mycobacterial infection (Table 2). On the basis of the history, clinical findings, results of TST  
13 and IGRA tests, and chest X-rays, no children were diagnosed with tuberculosis, and only two  
14 (2/606, 0.3%) had latent tuberculosis (Table 2).  
15  
16  
17  
18  
19  
20  
21

### 22 23 **Exposure times**

24 The children had a total exposure time from 3 to 18 hours with a mean of 6.9 hours (SD 4.7  
25 hours, range 3-18 hours)(Figure). More than half was exposed between 2 and 6 hours (n=360,  
26 59.4%), and about a third (n=223, 36.8%) were exposed more than 8 hours. There was a weak  
27 correlation between total exposure time and TST test results ( $r=0.17$ ,  $p < 0.01$ ) (Figure).  
28  
29  
30  
31  
32

### 33 **Description of the individuals with latent tuberculosis**

34 A 9 year old, healthy non-BCG vaccinated boy was exposed for 4.75 hours. He had a positive  
35 Mantoux of 8 mm, and negative chest X-ray and IGRA. Three months later a control IGRA  
36 turned out weakly positive (0.49 UI/ml), but the X-ray remained normal. Apart from exposure  
37 to the index case, no other risk factors were detected. The boy was diagnosed with latent  
38 tuberculosis and completed 3 months preventive treatment with isoniazid and rifampicin. An  
39 8 year old boy from Nigeria had been BCG vaccinated in his home country, and tested  
40 Mantoux negative upon arrival to Norway in 2009. Because he was mentally and physically  
41 disabled the index case worked as his personal assistant 4 hours every day for 3 days (in total  
42 12 hours). The boy was tested 4 weeks after the exposure and had a Mantoux test result of 3  
43 mm. Eight weeks after the last exposure an IGRA test was weakly positive (0.46 IU/ml). He  
44 had no clinical manifestations, and the chest X-ray was normal. He was diagnosed with latent  
45 tuberculosis. Recent infection could not be excluded, and he completed 3 months preventive  
46 isoniazid and rifampicin treatment.  
47  
48  
49  
50  
51  
52  
53  
54  
55  
56  
57  
58  
59  
60

1  
2  
3 Eight adults (8/136, 5.9%) were diagnosed with latent tuberculosis, but only 2 (2/136, 1.5%),  
4 a cousin and an uncle who had been in close and longstanding contact with the index case,  
5 were considered to be infected recently (data not shown).  
6  
7  
8  
9

## 10 DISCUSSION

11 We found that only 2 children in the after-school care centers developed latent tuberculosis  
12 after being exposed less than 18 hours to a highly infectious helper with smear-positive lung  
13 tuberculosis. No children in the day-care centers were infected. These observations support  
14 clinical experience that a brief exposure even to a highly infectious individual may not result  
15 in high risk for tuberculosis infection for healthy children. However, other factors than a brief  
16 exposure time may have contributed to a low transmission rate in the present context of day-  
17 care and after-school care facilities, such as the fact that the exposure took place in large  
18 rooms, that the air quality was good, and in particular that a substantial part of the exposure  
19 took place outdoors. A low transmission rate among the non-native children may also be  
20 explained by the fact that most were BCG vaccinated. Instead of being the result of  
21 environmental factors or patient characteristics, it has been described that particularly  
22 efficient human-to-human transmission may be seen with some *Mycobacterial tuberculosis*  
23 strains.<sup>8</sup> One healthy 9 years old boy without risk factors was infected despite a very brief  
24 exposure for 4-5 hours and it might raise a suspicion that this could be such a highly virulent  
25 strain. However, the fact that no more cases evolved during the next two years does not  
26 support this hypothesis.  
27  
28  
29  
30  
31  
32  
33  
34  
35  
36  
37  
38

39 Several reports have documented how long-term exposure to adults as well as children with  
40 tuberculosis increases the risk of transmission to other children in day-care centers,<sup>7,9</sup> in  
41 schools<sup>6,10,11</sup> and in health care institutions in high-income countries.<sup>8</sup> Although the evidence  
42 of the risk of brief exposure in such institutions is more limited, currently the Norwegian  
43 Institute of Public Health and others recommends investigating children who have been  
44 exposed to smear-positive individuals more than 8 hours.<sup>13,14</sup> A Swedish study reported that  
45 no tuberculosis transmission took place among 53 visiting children who were exposed to a  
46 highly infectious helper less than three days in a day-care center, corresponding to a total  
47 exposure time of less than 24 hours.<sup>7</sup> Thus, our study and the Swedish study quite similarly  
48 found that less than 18 to 24 hours exposure may not pose a significant risk for healthy  
49 children attending day-care or after school-care centers in Norway and Sweden. However,  
50 tuberculosis transmission is complex and several factors other than exposure time influence  
51  
52  
53  
54  
55  
56  
57  
58  
59  
60

1  
2  
3 the risk of being infected, in particular infectivity of the index case, various characteristics of  
4 the exposed children such as low age and vulnerability, and how close the exposure has been  
5 in terms of physical contact, room size and air quality.<sup>14</sup> Indeed, the fact that both children  
6 with latent tuberculosis had less than 12 hours exposure implies that others factors than  
7 exposure time might be more important. More More evidence on the impact of exposure time  
8 therefore should be collected before current guidelines may be changed in line with our  
9 observation.  
10  
11  
12  
13

14  
15 The index case had worked at several different locations during the three months he had  
16 symptoms. Due to the brief exposure at several places it was difficult to define an inner circle  
17 of more heavily exposed children to investigate first, and therefore it was decided to  
18 investigate all. We collected information about how long time the index case had worked at  
19 the various institutions from stored working lists, and adjusted it through an interview with  
20 him. Thus we believe that our estimates of exposure times are reliable. The index case did not  
21 work to the same extent with every child, and therefore the exposures of individual children  
22 probably have varied. ~~Nevertheless, he seemed to remember quite well the amount of time he~~  
23 ~~had spent with several individual children, and we think that he provided reliable estimates of~~  
24 ~~the exposure to the two children who were infected.~~ The National Institute of Public Health in  
25 Norway at the moment for this contact investigation recommended starting anti-tuberculous  
26 medication in all exposed children less than 2 years as soon as possible.<sup>13</sup> However, all 12  
27 children who were younger than 2 years old and many of the older children already had  
28 surpassed the “window period”. Hence no one was started on early medication, and most were  
29 examined for the first time approximately 2 to 3 months after exposure. We used from  
30 practical and economic reasons a TST as the primary screening tool, and an IGRA test as a  
31 confirmatory test, since the IGRA test may be more specific than TST, even in children less  
32 than five years old.<sup>15, 16</sup> We also used IGRA to examine some children with a legible TST  
33 result <6 mm in order to increase the chance of detecting infection, but because the diagnostic  
34 accuracy of both TST and IGRA tests is not optimal in children less than 5 years of age,<sup>15,16</sup>  
35 we cannot be sure that all latent cases have been detected. On the other hand, one may discuss  
36 whether the two children with latent tuberculosis were correctly diagnosed because they only  
37 had mildly elevated TST and IGRA test results. However, since latent infection could not be  
38 excluded, they were given prophylactic treatment. We found that TST induration correlated  
39 weakly with total exposure time. Many of the children with positive TST results were BCG-  
40  
41  
42  
43  
44  
45  
46  
47  
48  
49  
50  
51  
52  
53  
54  
55  
56  
57  
58  
59  
60

1  
2  
3 vaccinated non-native children without any clinical findings, and it may be a strength of the  
4 study that they were not classified as infected.  
5

6  
7 We conclude that Norwegian children attending several day-care and after-school care  
8 centers had a low risk of being infected after brief exposure less than 18 hours to a highly  
9 infectious adult helper with smear-positive pulmonary tuberculosis. These findings may  
10 suggest that contact investigation in day-care and after-school care centers may be avoided in  
11 children who are exposed less than 18 hours. However, several factors other than exposure  
12 time influence tuberculosis transmission, and more evidence should be collected before  
13 current public health guidelines may be changed in line with our observation.  
14  
15  
16  
17  
18  
19  
20  
21  
22  
23  
24  
25  
26  
27  
28  
29  
30  
31  
32  
33  
34  
35  
36  
37  
38  
39  
40  
41  
42  
43  
44  
45  
46  
47  
48  
49  
50  
51  
52  
53  
54  
55  
56  
57  
58  
59  
60

**Table 1** Number of children and adults at various day-care and after school-care centers who were exposed to an adult with smear-positive pulmonary tuberculosis

|                                    | Children |                                 | Adults |
|------------------------------------|----------|---------------------------------|--------|
|                                    | Number   | Mean age (years)<br>(SD, range) | Number |
| Day care centers (total)           | 191      | 3.9 (1.0, 1-6)                  | 44     |
| Center 1                           | 37       | 4.1 (0.7, 3-5)                  | 7      |
| Center 2                           | 12       | 1.5 (0.5, 1.2)                  | 4      |
| Center 3                           | 16       | 4.0 (0.7, 3-5)                  | 3      |
| Center 4 (3 departments)           | 43       | 4.1 (0.8, 3-5)                  | 17     |
| Center 5 (2 departments)           | 34       | 3.9 (1.0, 3-6)                  | 7      |
| Center 6                           | 27       | 4.0 (0.8, 3-5)                  | 3      |
| Center 7                           | 22       | 4.4 (1.1, 3-6)                  | 3      |
| After school care centers (total)  | 415      | 7.2 (0.9, 5-9)                  | 44     |
| Center 1 (4 classes)               | 193      | 7.2 (1.0, 5-9)                  | 13     |
| Center 2 (1 class)                 | 33       | 8.1 (0.2, 8-9)                  | 8      |
| Center 3 (4 classes)               | 118      | 6.9 (0.8, 6-9)                  | 10     |
| Center 4 (3 classes)               | 71       | 7.6 (0.7, 7-9)                  | 13     |
| Colleagues (telemarketing company) |          |                                 | 19     |
| Family                             |          |                                 | 17     |
| Friends and girlfriend             |          |                                 | 12     |
| Total investigated contacts        | 606      | 6.1 (1.8, 1-9)                  | 136    |

**Table 2** BCG status, test results of tuberculin skin test (TST) and interferon- $\gamma$  release assay (IGRA), result of chest X ray, number of children referred to hospital and number with latent tuberculosis in relation to nationality and specified into age groups less than or more than 5 years for children who were exposed to an adult with smear-positive pulmonary tuberculosis

|                                       | Native Norwegian  |                         |                | Non-native born in Norway |                        |               | Non-native born abroad |                       |               | All children<br>N=606 |
|---------------------------------------|-------------------|-------------------------|----------------|---------------------------|------------------------|---------------|------------------------|-----------------------|---------------|-----------------------|
|                                       | <5 years<br>N=119 | $\geq$ 5 years<br>N=453 | Total<br>N=572 | <5 years<br>N=10          | $\geq$ 5 years<br>N=12 | Total<br>N=22 | <5 years<br>N=4        | $\geq$ 5 years<br>N=8 | Total<br>N=12 |                       |
| BCG vaccinated                        | 2 (1.7)*          | 8 (1.8)                 | 10 (1.7)       | 10 (100)                  | 9 (75.0)               | 19 (86.4)     | 1 (25.0)               | 7 (87.5)              | 8 (66.7)      | 37 (6.1)              |
| TST 4-5 mm                            | 2 (1.7)           | 0                       | 2 (0.3)        | 0                         | 1 (8.3)                | 1 (4.5)       | 1 (25.0)               | 2 (25.0)              | 3 (25.0)      | 6 (1.0)               |
| TST $\geq$ 6 mm                       | 2 (1.7)           | 5 (1.1)                 | 7 (1.2)        | 1 (10.0)                  | 2 (16.7)               | 3 (13.6)      | 0                      | 1 (12.5)              | 1 (8.3)       | 11 (1.8)              |
| BCG vaccinated and<br>TST $\geq$ 4 mm | 0 (0)**           | 3 (37.5)                | 3 (30.0)       | 1 (10.0)                  | 3 (33.3)               | 4 (21.1)      | 1 (100)                | 3 (42.9)              | 4 (50.0)      | 11 (29.7)             |
| IGRA positive                         | 0                 | 1 (0.2)                 | 1 (0.2)        | 0                         | 0                      | 0             | 0                      | 2 (25.0)              | 2 (16.7)      | 3 (0.5)               |
| X-ray positive                        | 2 (1.7)           | 0                       | 2 (0.3)        | 0                         | 0                      | 0             | 0                      | 0                     | 0             | 2 (0.3)               |
| Referred to hospital                  | 12 (10.0)         | 1 (0.2)                 | 13 (2.3)       | 1 (10.0)                  | 0                      | 1 (4.5)       | 0                      | 2 (25.0)              | 2 (16.7)      | 16 (2.6)              |
| Latent tuberculosis                   | 0                 | 1 (0.2)                 | 1 (0.2)        | 0                         | 0                      | 0             | 0                      | 1 (12.5)              | 1 (8.3)       | 2 (0.3)               |

\*number (percent of children in the column);\*\*number (percent of BCG vaccinated children)

1  
2  
3 **Acknowledgement** Susceptibility testing of the M. tuberculosis isolate was done at the  
4 National reference laboratory for mycobacteria at the Norwegian Institute of Public Health.  
5 We are grateful to Dr. Per Eirik Hæreid who participated in the preparation of the manuscript.  
6  
7  
8

9  
10 **Contributors** Henrik Døllner initiated the study and is the main responsible for the study  
11 (guarantor), participated in the analysis of the data and in the writing of the manuscript and  
12 revised it critically, and approved the final version; Christina Terez Ramm participated in the  
13 planning of the study, collected all data, participated in the analysis of the data, wrote the first  
14 draft of the manuscript, revised it critically and approved the final version; Ingunn Harstad  
15 participated in the interpretation of the data, participated in the writing of the manuscript,  
16 revised it critically and approved the final version; Jan Egil Afset participated in the  
17 interpretation of the data, participated in the writing of the manuscript, revised it critically and  
18 approved the final version; Eli Sagvik was responsible for the contact investigation,  
19 participated in the planning of the study, participated in the interpretation of the data,  
20 participated in the writing of the manuscript and revised it critically and approved the final  
21 version.  
22  
23  
24  
25  
26  
27  
28  
29

30  
31 **Funding** None.  
32  
33

34 **Competing interests** None.  
35  
36

37  
38 **Ethics approval** The Regional Committee for Medical and Health Research Ethics in Mid-  
39 Norway approved the study, including an exemption to collect informed consents from the  
40 participating individuals. The index case accepted to participate in interviews and to publish  
41 the information.  
42  
43  
44

45  
46 **Data sharing statement** There are no additional data available.  
47  
48  
49  
50  
51  
52  
53  
54  
55  
56  
57  
58  
59  
60



## REFERENCES

1. Newton SM, Brent AJ, Anderson S, et al. Paediatric tuberculosis. *Lancet Infect Dis* 2008;**8**:498-510.
2. Paranjothy S, Eisenhut M, Lilley M, et al. Extensive transmission of Mycobacterium tuberculosis from 9 year old child with pulmonary tuberculosis and negative sputum smear. *BMJ* 2008;**337**:573-5.
3. Cardona M, Bek MD, Mills K, et al. Transmission of tuberculosis from a seven-year-old child in a Sydney school. *J Paediatr Child Health* 1999;**35**:375-8.
4. Singh M, Mynak ML, Kumar L, et al. Prevalence and risk factors for transmission of infection among children in household contact with adults having pulmonary tuberculosis. *Arch Dis Child* 2005;**90**:624-8.
5. Ewer K, Deeks J, Alvarez L, et al. Comparison of T-cell-based assay with tuberculin skin test for diagnosis of Mycobacterium tuberculosis infection in a school tuberculosis outbreak. *Lancet* 2003;**361**:1168-73.
6. Caley M, Fowler T, Welch S, et al. Risk of developing tuberculosis from a school contact: retrospective cohort study, United Kingdom, 2009. *Euro Surveill* 2010;**15**(11). [www.eurosurveillance.org/ViewArticle.aspx?ArticleId=19510](http://www.eurosurveillance.org/ViewArticle.aspx?ArticleId=19510) (accessed 7 Jun 2012).
7. Gillman A, Berggren I, Bergstrom SE, et al. Primary tuberculosis infection in 35 children at a Swedish day care center. *Pediatr Infect Dis J* 2008;**27**:1078-82.
8. Valway SE, Sanchez MP, Shinnick TF, et al. An outbreak involving extensive transmission of a virulent strain of Mycobacterium tuberculosis. *N Engl J Med* 1998;**338**:633-9.
9. Aivazis V, Pardalos G, Kirkou-Thanou P, et al. Tuberculosis outbreak in a day care centre: always a risk. *Acta Paediatr* 2004;**93**:140.
10. Higuchi K, Kondo S, Wada M, et al. Contact investigation in a primary school using a whole blood interferon-gamma assay. *J Infect* 2009;**58**:352-7.
11. Roberts JR, Mason BW, Paranjothy S, et al. The transmission of tuberculosis in schools involving children 3 to 11 years of age. *Pediatr Infect Dis J* 2012;**31**:82-4.
12. Reynolds DL, Gillis F, Kitai I, et al. Transmission of Mycobacterium tuberculosis from an infant. *Int J Tuberc Lung Dis* 2006;**10**:1051-6.
13. Tuberkuloseveilederen som e-bok. The Norwegian Institute of Public Health. [www.fhi.no/eway/default.aspx?pid=233&trg=MainArea\\_5561&MainArea\\_5661=6034:0:15,5092:1:0:0:::0:0](http://www.fhi.no/eway/default.aspx?pid=233&trg=MainArea_5561&MainArea_5661=6034:0:15,5092:1:0:0:::0:0) (accessed 7 Jun 2012).
14. Erkens CG, Kamphorst M, Abubakar I, et al. Tuberculosis contact investigation in low prevalence countries: a European consensus. *Eur Respir J* 2010;**36**:925-49.
15. Mandalakas AM, Detjen AK, Hesseling AC, et al. Interferon-gamma release assays and childhood tuberculosis: systematic review and meta-analysis. *Int J Tuberc Lung Dis* 2011;**15**:1018-32.
16. Machingaidze S, Wiysonge CS, Gonzalez-Angulo Y, et al. The utility of an interferon gamma release assay for diagnosis of latent tuberculosis infection and disease in children: a systematic review and meta-analysis. *Pediatr Infect Dis J* 2011;**30**:694-700.

### Article focus

- It is well-known that prolonged exposure to adults with smear-positive pulmonary tuberculosis increases the risk of being infected in children.
- Limited evidence exists on the risk of brief exposure among children in day-care or after-school care facilities in high-income countries.

### Key Messages

- Only 2 out of 606 (0.3%) children attending several Norwegian day-care and after-school care centers were diagnosed with latent tuberculosis after being exposed less than 18 hours to a highly infectious smear-positive adult helper with pulmonary tuberculosis.
- Tuberculosis transmission is complex and may be influenced by other factors than exposure time.
- More evidence should be collected before current public health recommendations for the investigation of exposed children in day-care and after school care may be changed.

### Strengths and limitations

- This large contact investigation may be the nearest to come an intervention study.
- Reliable information about exposure times was available.
- Although it is a strength that latent tuberculosis was diagnosed using a tuberculin skin test in every child and an interferon gamma release assay as a confirmatory test, it is a limitation that the sensitivity of both tests may not be optimal in children.

### Figure legends

**Figure 1** Number of children who were exposed to an adult helper with smear-positive tuberculosis in relation to tuberculin skin tests induration (mm) and total exposure time (hours).
